# Supplementary material
Source: PubMed Central journal article supplement (PMC3120040)
Supplement: NIHMS297750-supplement-Supplementary_Data.pdf [file NIHMS297750-supplement-Supplementary_Data.pdf]

# Supplementary Materials for: Analytical description of extension, torque and supercoiling radius of a stretched twisted DNA

Sébastien Neukirch<sup>1,2</sup>

<sup>1</sup>CNRS, UMR 7190, Institut Jean Le Rond d'Alembert,  
F-75005 Paris, France.

<sup>2</sup>UPMC Univ Paris 06, UMR 7190,  
Institut Jean Le Rond d'Alembert, F-75005 Paris, France.

John F. Marko

Department of Physics and Astronomy  
and Department of Molecular Biosciences,  
Northwestern University, Evanston IL 60208

(Dated: February 11, 2011)

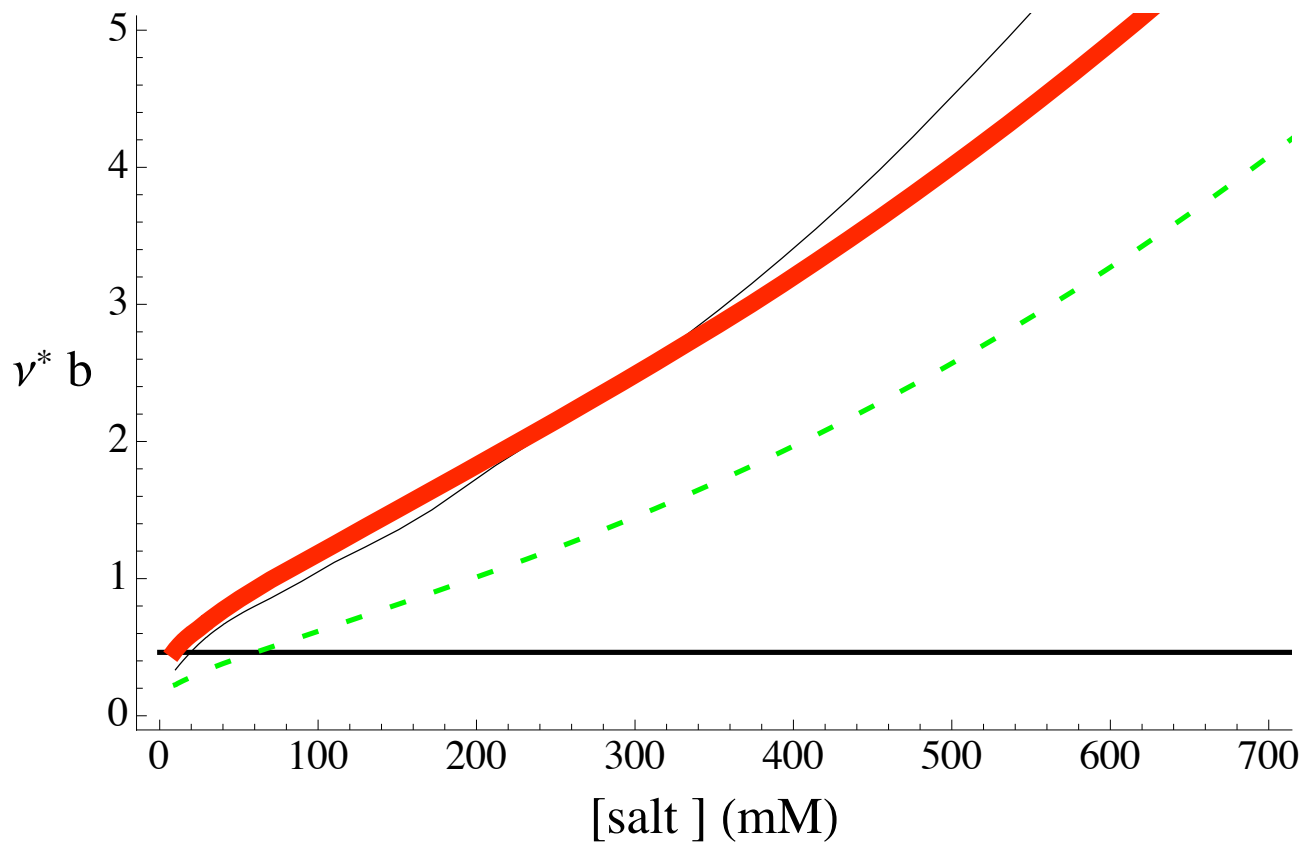

SUPP. FIG. 1: Comparison of the effective charge  $\nu^*$  appearing in Eq. 2 as given by: (a) Stigter [1, 2] with  $a = 1$  nm (thick, red); (b) Ubbink & Odijk [3]  $\nu^* = \xi/L_B$  with  $\xi$  given in their Table 7 (thin, black); (c) Maffeo *et al* [4]  $\nu^* = \chi\nu$  with  $\chi = 0.42$  and  $a = 1.2$  nm (short dashed, green); (d) Manning counter-ion condensation theory  $\nu^* = 0.46$  (constant line). The DNA structural charge corresponds to  $\nu b = 1$ .

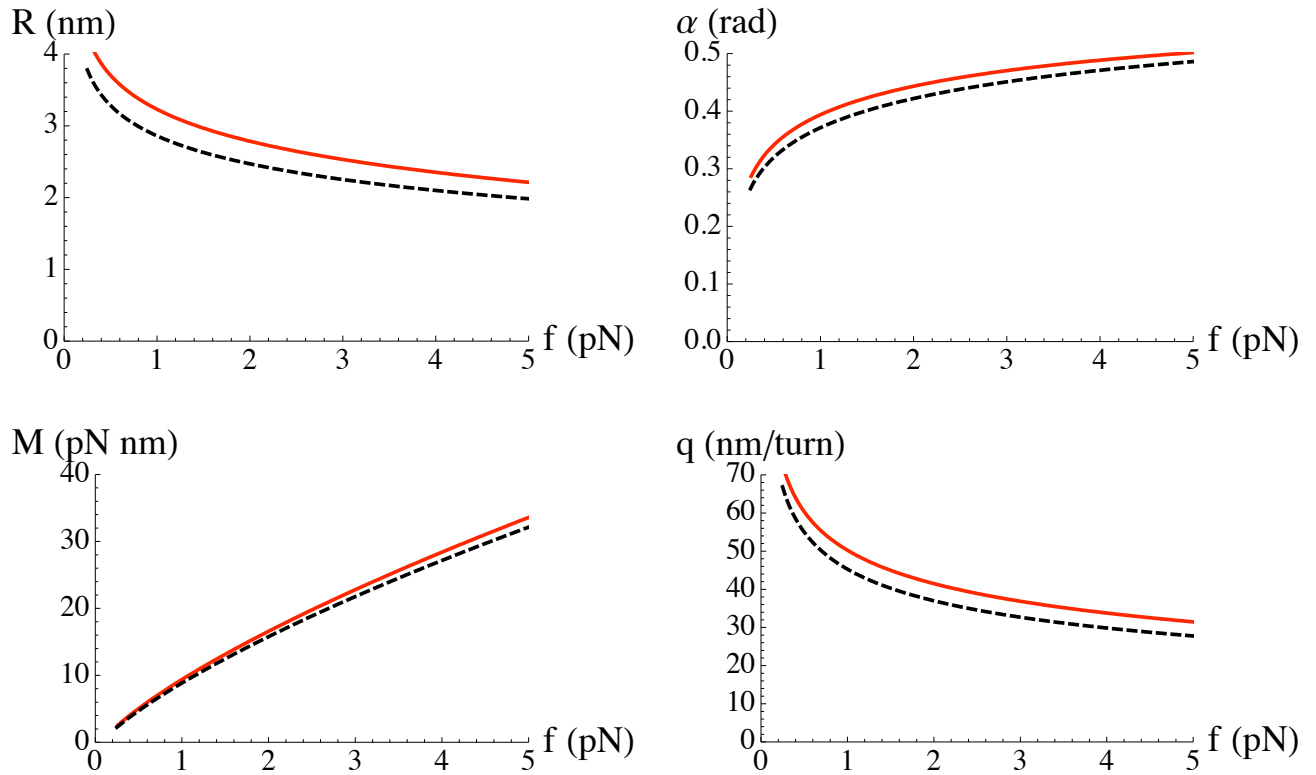

SUPP. FIG. 2: Comparison between the solutions of  $\nabla\mathcal{G} = \mathbf{0}$  (plain lines, red) and formulae (14), (16), and (17) (dashed lines, black), at 100mM with  $a = 1$  nm,  $A = 50$  nm, and  $C = 95$  nm.

- 
- [1] J. A. Schellman and D. Stigter, *Biopolymers* **16**, 1415 (1977).  
 [2] D. Stigter, *J. Colloid Int. Sci.* **53**, 296 (1975).  
 [3] J. Ubbink and T. Odijk, *Biophys. J.* **76**, 2502 (1999).  
 [4] C. Maffeo, R. Schöpflin, H. Brutzer, R. Stehr, A. Aksimentiev, G. Wedemann, and R. Seidel, *Phys. Rev. Lett.* **105**, 158101 (2010).
